# Supplementary material for: The diagnostic value of hydroxyproline combined with tuberculosis infection T lymphocyte spot assay in pulmonary tuberculosis
Source: PubMed Central journal article supplement — J Thorac Dis. 2024 Oct 30;16(10):7052–62. doi: 10.21037/jtd-24-1585 (PMC11565317; doi:10.21037/jtd-24-1585), 2024-10-30
Supplement: jtd-16-10-7052-dss.pdf [file jtd-16-10-7052-dss.pdf]

## Data Sharing Statement

|                     |                                                                                                                                                     |                                                                                                                                                |
|---------------------|-----------------------------------------------------------------------------------------------------------------------------------------------------|------------------------------------------------------------------------------------------------------------------------------------------------|
| <b>Article Info</b> | <a href="https://dx.doi.org/10.21037/jtd-24-1585">https://dx.doi.org/10.21037/jtd-24-1585</a>                                                       |                                                                                                                                                |
| <b>Item</b>         | <b>Question</b>                                                                                                                                     | <b>Authors' Response<br/>(place "-" if not applicable)</b>                                                                                     |
| 1                   | Would you like to share data collected for your study to others?                                                                                    | Yes.                                                                                                                                           |
| 2                   | If not, would you like to share the reason for your decision?                                                                                       | -                                                                                                                                              |
| 3                   | What data in particular will be shared?                                                                                                             | All experimental results of HYP detection in the control group and the PTB group have been seen with the corresponding patient clinical tests. |
| 4                   | Any other documents will be shared? Such as study protocol, statistical analysis plan, informed consent form, clinical study report, analytic code. | Study protocol, statistical analysis plan, informed consent form, clinical study report will also be shared if requested.                      |
| 5                   | When will data availability begin?                                                                                                                  | From the publication date.                                                                                                                     |
| 6                   | When will data availability end?                                                                                                                    | Two years within the publication date.                                                                                                         |
| 7                   | To whom will you share the data?                                                                                                                    | Clinical researchers engaged in tuberculosis research.                                                                                         |
| 8                   | For what type of analysis or purpose?                                                                                                               | To analyze whether HYP can be used in the clinical diagnosis of tuberculosis.                                                                  |
| 9                   | How or where can the data/documents be obtained?                                                                                                    | Emails could be sent to the address below to obtain the shared data: 728224530@qq.com.                                                         |
| 10                  | Any other restrictions?                                                                                                                             | We may balance the potential benefits and risks for each request and then provide the data that could be shared.                               |
